# Supplementary material for: MOF-derived Co9S8polyhedrons on NiCo2S4nanowires for high-performance hybrid supercapacitors
Source: Royal Society of Chemistry journal article supplement (doi:10.1039/d0qi00651c), 2020-01-01
Supplement: d0qi00651c1.pdf [file d0qi00651c1.pdf]

## Supporting information

### **MOF-derived Co<sub>9</sub>S<sub>8</sub> polyhedrons on NiCo<sub>2</sub>S<sub>4</sub> nanowires for high performance hybrid supercapacitors**

Yu Liu<sup>a</sup>, Zhenlin Ma<sup>a</sup>, Haoting Niu<sup>a</sup>, Qingjun Yang<sup>a</sup>, Hong Jia<sup>b</sup>, Weidong Shi<sup>a\*</sup>

<sup>a</sup> *School of Chemistry and Chemical Engineering, Jiangsu University, Zhenjiang, 212013, P. R. China.*

<sup>b</sup> *College of Physics and Electronic Information & Henan Key Laboratory of Electromagnetic Transformation and Detection, Luoyang Normal University, Luoyang, 471934, China*

E-mail: [liuyu@ujs.edu.cn](mailto:liuyu@ujs.edu.cn), [swd1978@ujs.edu.cn](mailto:swd1978@ujs.edu.cn)

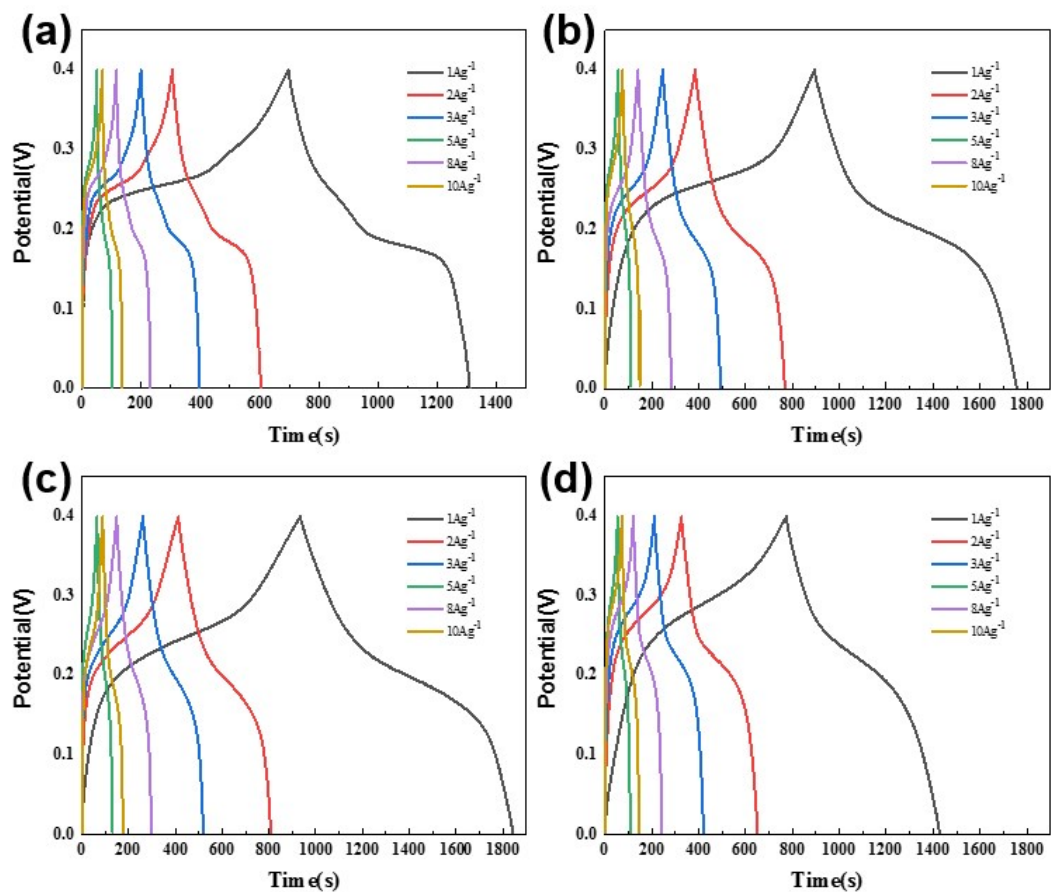

Fig. S1 GCD curves of  $\text{NiCo}_2\text{S}_4/\text{Co}_9\text{S}_8$  composites (a) NCS, (b) NCS-0.5, (c) NCS-1 and (d) NCS-6

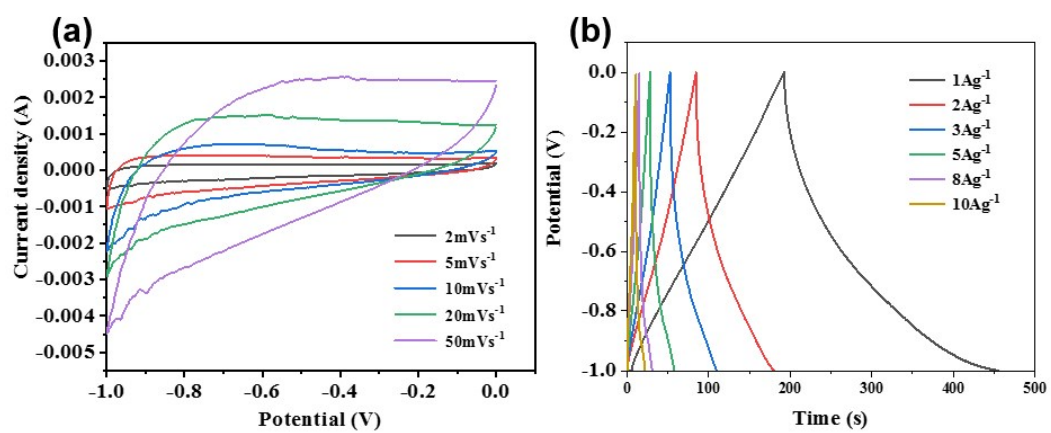

Fig. S2 (a) and (b) are the CV and GCD curves of activated carbon.

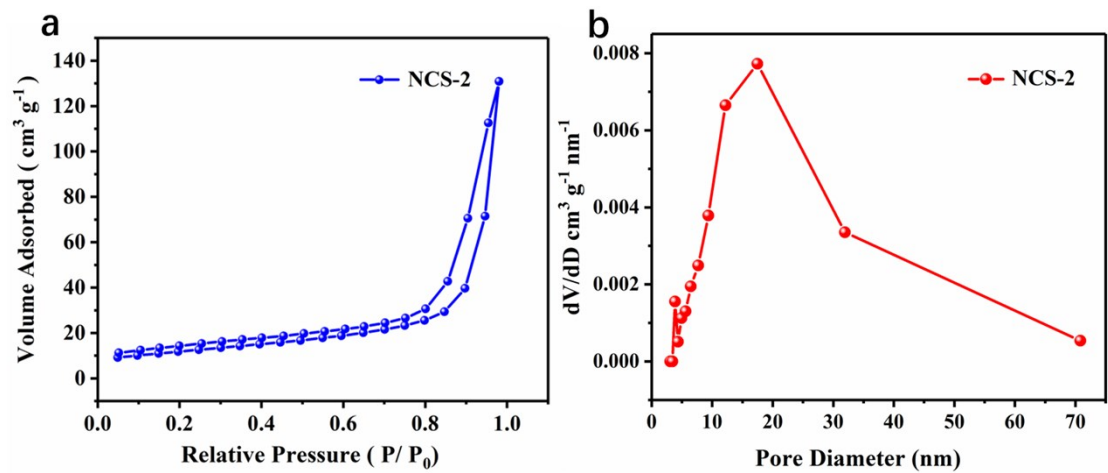

**Fig. S3** (a) Nitrogen adsorption and desorption isotherms and (b) the corresponding pore size distribution plots of NCS-2.

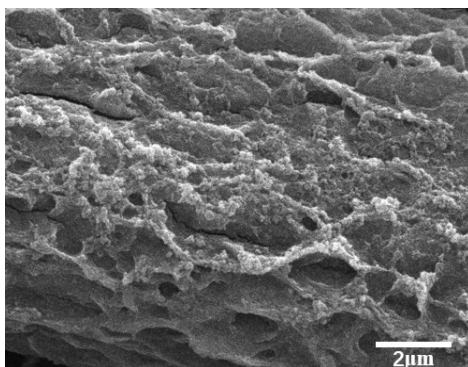

**Fig. S4** SEM image of NCS-2 after 8000 charge/discharge processes.
